# Supplementary material
Source: Springer Nature journal article supplement (https://www.springermedizin.de/resource/supplementary/12891_2011_1401_MOESM3_ESM.pdf/9507846)

Fig 3 Transfusion requirement in odd ratio

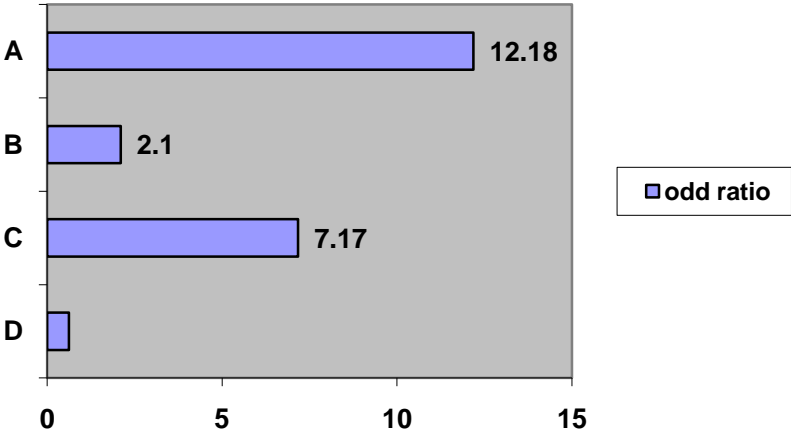

Supplement: MOESM3 [file 9507846]
